# Supplementary material for: Cyclizative radical carbonylations of azaenynes by TTMSS and hexanethiol leading to α-silyl- and thiomethylene lactams. Insights into the E/Z stereoselectivities
Source: Royal Society of Chemistry journal article supplement (doi:10.1039/b309944j), 2003-01-01
Supplement: b309944j.doc [file b309944j.doc]

**Supplementary Materials**

**Cyclizative radical carbonylations of azaenynes by TTMSS and hexanethiol leading to -silyl- and thiomethylene lactams. Insights into the E/Z stereoselectivities**

Mami Tojino,*a* Noboru Otsuka,*a* Takahide Fukuyama,*a* Hiroshi Matsubara,*b* Carl H. Schiesser,*b* Hiroki Kuriyama,*c* Hironari Miyazato,*c* Satoshi Minakata,*c* Mitsuo Komatsu,*c*and Ilhyong Ryu**a*

*a* Department of Chemistry, Faculty of Arts and Sciences, Osaka Prefecture University,

Sakai, Osaka 599-8531, Japan

*b* School of Chemistry, Bio21 Molecular Science and Biotechnology Institute, The University of Melbourne, Victoria 3010, Australia

*c* Department of Applied Chemistry, Graduate School of Engineering, Osaka University, Suita, Osaka 565-0821, Japan

______________________________________________________________________________

Spectroscopic data for compounds **2a**-**2d**, **2f**, **3a**-**3d**, and **3f**. HF/DZP and B3LYP/DZP Gaussian Archive entries for the optimized structures in this study (15 pages).

______________________________________________________________________________

***N*-Isobutyl-3-tris(trimethylsilyl)silylmethylene-2-azetidinone 2a**

Isolated as colourless oil (*E*/*Z* = 85/15),max(neat)/cm-1 *E* isomer: 1752 (C=O) and 1386 (C=C); *Z* isomer: 1751 (C=O) and 1390 (C=C); H (270 MHz; CDCl3) 0.20 (27H, s, H-5), 0.94 (6H, d, *J* 6.6, H-8), 1.93 (1H, tseptet, *J* 7.3 and 6.6, H-7), 3.16 (2H, d, *J* 6.6, H-6), 3.72 (2H, d, *J* 1.7, H-3) and 6.42 (1H, t, *J* 1.7, H-4); *Z* isomer: 0.22 (27H, s, H-5), 0.92 (6H, d, *J* 6.6, H-8), 1.87 (1H, tseptet, *J* 6.9 and 6.6, H-7), 3.14 (2H, d, *J* 6.9, H-6), 3.68 (2H, d, *J* 1.3, H-3) and 5.81 (1H, t, *J* 1.3, H-4); C (68MHz; CDCl3) *E* isomer: 0.94 (C-5), 22.63 (C-8), 27.68 (C-7), 49.63 (C-6), 51.63 (C-3), 120.68 (C-4), 151.30 (C-2) and 163.77 (C-1); *Z* isomer: 0.92 (C-5), 20.24 (C-8), 27.64 (C-7), 49.44 (C-6), 51.05 (C-3), 122.75 (C-4), 151.41 (C-2) and 164.44 (C-1); *m/z* (EI) *E* isomer: 385 (M+, 2%), 370 (6), 312 (47), 254 (10), 198 (15), 73 (100); *Z* isomer: 385 (M+, 0.2%), 370 (5), 312 (21), 73 (100) (*E* isomer: Found M+ 385.2112. C17H39NOSi4 requires *M* 385.2109. *Z* isomer: Found: M+,385.2104. C17H39NOSi4 requires *M*, 385.2109). NOE between H3 and H4: 19.0% (E); 13.2 (Z).

***N*-Isobutyl-4-pentyl-3-tris(trimethylsilyl)silylmethylene-2-azetidinone 2b**

Isolated as colourless oil (*E*/*Z* = 27/63), max(neat)/cm-1 *E* isomer: 1751 (C=O); *Z* isomer: 1748 (C=O); H (270 MHz; CDCl3) *E* isomer: 0.21 (27H, s, H-5), 0.89 (3H, t, *J* 6.6, H-13), 0.92 (3H, d, *J* 6.6, H-8), 0.96 (3H, d, *J* 6.6, H-8), 1.24-1.35 (8H, m, H-9, 10, 11, 12), 1.93 (1H, m, H-7), 2.86 (1H, dd, *J* 13.9 and 5.9, H-6), 3.38 (1H, dd, *J* 13.9 and 8.4, H-6), 4.09-4.12 (1H, m, H-3) and 6.30 (1H, d, *J* = 1.3 Hz, H-4); *Z* isomer: 0.22 (27 H, s, H-5), 0.87-1.00 (9H, m, H-8, 13), 1.32-1.71 (8H, m, H-9, 10, 11, 12), 1.88 (1H, septet, *J* 5.0, H-7), 2.86 (1H, dd, *J* 13.8 and 5.9, H-6), 3.29 (1H, dd, *J* 13.8 and 8.1, H-6), 3.94 (1H, t, *J* 5.0, H-3) and 5.75 (1H, d, *J* 1.0, H-4); C (68MHz; CDCl3) *E* isomer:1.20 (C-5), 13.98 (C-13), 20.28 (C-8), 20.47 (C-8), 22.63 (C-9, 10, 11 or 12), 24.68 (C-9, 10, 11 or 12), 27.78 (C-7), 31.18 (C-9, 10, 11 or 12), 31.95 (C-9, 10, 11 or 12), 48.45 (C-6), 62.73 (C-3), 118.66 (C-4), 155.17 (C-2) and 164.02 (C-1); *Z* isomer: 1.23 (C-5), 13.89 (C-13), 20.25 (C-8), 20.39 (C-8), 22.49 (C-9, 10, 11 or 12), 24.49 (C-9, 10, 11 or 12), 27.85 (C-7), 31.52 (C-9, 10, 11 or 12), 31.92 (C-9, 10, 11 or 12), 47.64 (C-6), 61.96 (C-3), 120.85 (C-4), 156.26 (C-2) and 164.36 (C-1); *m/z* *Z* isomer: 455 (M+, 7%), 440 (14), 382 (100), 73 (15) (*Z* isomer: Found: M+,455.2894. C22H49NOSi4 requires *M*, 455.2891).

***N*-Isobutyl-4-isopropyl-3-tris(trimethylsilyl)silylmethylene-2-azetidinone 2c**

Isolated as colourless oil (*E*/*Z* = 14/86), max(neat)/cm-1 *Z* isomer: 1748 (C=O); *E* isomer: 1749 (C=O); H (270 MHz; CDCl3) *Z* isomer: 0.21 (27H, s, H-5), 0.89 (3H, t, *J* 6.6, H-10), 0.91 (6H, d, *J* 5.3, H-8), 0.93 (3H, d, *J* 5.3, H-8), 1.00 (3H, d, J 6.9, H-10), 1.84-2.03 (2H, m, H-7, 9), 2.81 (1H, dd, *J* 13.9 and 5.9, H-6), 3.38 (1H, dd, *J* 13.9 and 8.9, H-6), 3.90 (1H, dd, *J* 2.3 and 1.0, H-3) and 5.76 (1H, d, *J* 1.0, H-4); C (68MHz; CDCl3) *Z* isomer: 0.92 (C-5), 17.11 (C-10), 18.35 (C-10), 20.16 (C-8), 20.38 (C-8), 27.50 (C-7), 29.06 (C-9), 48.28 (C-6), 66.75 (C-3), 121.76 (C-4), 154.32 (C-2) and 164.62 (C-1); *m/z* (EI) *E* isomer: 427 (M+, 6%), 412 (26), 354 (100), 73 (60); *Z* isomer: 427 (M+, 5%), 412 (17), 354 (100), 73 (30) (*E* isomer: Found: M+, 427.2577. C20H45NOSi4 requires *M*, 427.2578, *Z* isomer: Found: M+, 427.2578. C20H45NOSi4 requires *M*, 427.2578).

***N*-Isobutyl-3-tris(trimethylsilyl)silylmethylene-2-pyrrolidinone 2d**

Isolated as colourless oil (*E*/*Z* = 93/7), max(neat)/cm-1 *E* isomer: 1686 (C=O) and 1442 (C=C); *Z* isomer: 1693 (C=O) and 1444 (C=C);H (270 MHz; CDCl3) *E* isomer: 0.21 (27H, s, H-6), 0.91 (6H, d, *J* 6.6, H-9), 1.96 (1H, tseptet, *J* 7.3 and 6.6, H-8), 2.68 (2H, dt, *J* 6.3 and 2.6, H-3), 3.18 (2H, d, *J* 7.3, H-7), 3.36 (2H, t, *J* 6.3, H-4) and 6.76 (1H, t, *J* 2.6, H-5); *Z* isomer: 0.17 (27H, s, H-6), 0.91 (6H, d, *J* 6.6, H-9), 1.92 (1H, tseptet, *J* 7.6 and 6.6, H-8), 2.77 (2H, dt, *J* 6.6 and 2.3, H-3), 3.14 (2H, d, *J* 7.6, H-7), 3.32 (2H, t, *J* 6.6, H-4) and 6.05 (1H, t, *J* 2.3, H-5); C (68MHz; CDCl3) *E* isomer:1.22 (C-6), 20.15 (C-9), 26.67 (C-3 or 8), 26.72 (C-3 or 8), 44.31 (C-4), 51.04 (C-7), 125.75 (C-5), 146.72 (C-2) and 167.35 (C-1); *Z* isomer: 1.40 (C-6), 20.02 (C-9), 26.44 (C-8), 28.63 (C-3), 44.08 (C-4), 50.51 (C-7), 127.66 (C-5), 145.91 (C-2) and 167.83 (C-1); *m/z* (EI) *E* isomer: 399 (M+, 1%), 384 (6.6), 326 (88), 252 (25), 210 (59), 73 (100); *Z* isomer: 399 (M+, 0.2%), 384 (7), 326 (100), 252 (23), 73 (59) (*E* isomer: Found: M+,399.2248. C18H41NOSi4 requires *M*,399.2265; *Z* isomer: Found: M+,399.2261. C18H41NOSi4 requires *M,* 399.2265). NOE between H3 and H5: 16.4% (E), 11.2 (Z).

***N*-Isobutyl-3-tris(trimthylsilyl)silylmethylene-1-azacycloheptan-2-one 2f**

Isolated as colourless oil (*E*/*Z* = 85/15),max(neat)/cm-1 *E* isomer: 1638 (C=O) and 1468 (C=C); *Z* isomer: 1643 (C=O) and 1469 (C=C); H (270 MHz; CDCl3) *E* isomer: 0.21 (27H, s, H-8), 0.91 (6H, d, *J* 6.6, H-11), 1.65-1.75 (4H, m, H-4,5), 1.92 (1H, tseptet, *J* 7.3 and 6.6, H-10), 2.37 (2H, dt, *J* 6.9 and 4.3, H-3), 3.21 (2H, d, *J* 7.3, H-9), 3.27 (2H, dt, *J* 6.3 and 4.3, H-6) and 6.18 (1H, s, H-7); *Z* isomer:0.18 (27H, s, H-8), 0.94 (6H, d, *J* 6.6, H-11), 1.64-1.77 (4H, m, H-4,5), 1.87 (1H, tseptet, *J* 7.6 and 6.6, H-10), 2.36 (2H, dt, *J* 6.3 and 5.3, H-3), 3.23 (2H, d, *J* 7.6, H-9), 3.30 (2H, dt, *J* 5.0 and 4.6, H-6) and 5.69 (1H, s, H-7); C (68MHz; CDCl3) *E* isomer:1.35 (C-8), 20.25 (C-11), 26.53 (C-4 or 5), 27.10 (C-4 or 5), 27.51 (C-10), 32.22 (C-3), 48.57 (C-6), 55.29 (C-9), 127.60 (C-7), 154.77 (C-2) and 173.62 (C-1); *Z* isomer: 1.22 (C-8), 20.27 (C-11), 27.42 (C-10), 28.41 (C-4 or 5), 31.36 (4 or 5), 38.37 (C-3), 50.23 (C-6), 55.11 (C-9), 125.28 (C-7), 154.90 (C-2) and 173.44 (C-1); *m/z* (EI), *E* isomer: 427 (M+, 1%), 412 (7), 354 (100), 298 (7), 280 (8), 73 (7); *Z* isomer: 427 (M+, 4%), 412 (13), 354 (100), 280 (7), 238 (69), 73 (13) (*E* isomer: Found: M+, 427.2588. C20H45NOSi4 requires *M*, 427.2578; *Z* isomer: Found: M+, 427.2576. C20H45NOSi4 requires *M*, 427.2578). NOE between H3 and H7: 7.0% (E), 6.6 (Z).

***N*-Isobutyl-3-tris(trimthylsilyl)silylmethylene-1-azacyclooctan-2-one 2g**

Isolated as colourless oil (*E*/*Z* = 38/62), max(neat)/cm-1 *E* isomer: 1640 (C=O); *Z* isomer: 1642 (C=O); H (500 MHz; CDCl3) *E* isomer: 0.19 (27H, s, H-8), 0.90 (6H, d, *J* 6.6, H-12), 1.45-1.65 (6H, m, H-4, 5, 6), 2.00 (1H, septet, *J* 6.6, H-11), 2.40-2.47 (2H, m, H-3), 3.08-3.20 (2H, m, H-10), 3.38-3.50 (2H, m, H-8) and 5.42 (1H, s, H-8); *Z* isomer: 0.17 (27H, s, H-8), 0.95 (6H, d, *J* 6.4, H-12), 1.55-1.65 (6H, m, H-4, 5, 6), 1.92 (1H, septet, *J* 6.9, H-11), 2.44-2.49 (2H, m, H-3), 3.22 (2H, d, *J* 7.3, H-10), 3.45-3.51 (2H, m, H-7) and 5.51 (1H, s, H-8); C (125MHz; CDCl3) *E* isomer: 1.31 (C-9), 20.13 (C-12), 24.14 (C-4 or 5 or 6), 26.93 (C-4 or 5 or 6), 26.99 (C-4 or 5 or 6), 28.76 (C-11), 37.55 (C-3), 46.74 (C-7), 50.74 (C-10), 119.31 (C-8), 156.28 (C-2) and 175.50 (C-1); *Z* isomer:1.26 (C-9), 21.17 (C-12), 25.77 (C-4 or 5 or 6), 27.82 (C-4 or 5 or 6), 28.91 (C-4 or 5 or 6), 30.49 (C-11), 44.76 (C-3), 50.13 (C-7), 55.15 (C-10), 121.94 (C-8), 154.98 (C-2) and 173.70 (C-1); *m/z* (EI), *E* isomer: 441 (M+, 3%), 368 (100), 266 (14), 252 (55), 73 (53); *Z* isomer: 441 (M+, 1%), 368 (100), 314 (21), 73 (37) (*E* isomer: Found: M+, 441.2737. C21H47NOSi4 requires *M*, 441.2735. *Z* isomer: Found: M+, 441.2726. C21H47NOSi4 requires *M*, 441.2735).

**3-Hexylsulfanylmethylene-1-isobutyl-2-azetidinone 3a**

#

Isolated as colourless oil (*E/Z* = 86/14), max(neat)/cm-1 *E* isomer: 1745 (C=O) and 1671 (C=C); *Z* isomer: 1730 (C=O) and 1665 (C=C); H (500 MHz; CDCl3) *E* isomer: 0.88 (3H, t, *J* 6.9, H-10), 0.92 (6H, d, *J* 6.9, H-13), 1.26-1.32 (4H, m, H-8, 9), 1.37 (2H, quintet, *J* 7.3, H-7), 1.64 (2H, quintet, *J* 7.3, H-6), 1.87 (1H, septet, *J* 6.9, H-12), 2.75 (2H, t, *J* 7.3, H-5), 3.10 (2H, d, *J* 7.3, H-11), 3.74 (2H, s, H-3) and 6.75 (1H, s, H-4); *Z* isomer: 0.87 (3H, t, *J* 7.1, H-10), 0.91 (6H, d, *J* 6.9, H-13), 1.25-1.31 (4H, m, H-8, 9), 1.40 (2H, quintet, *J* 7.3, H-7), 1.65 (2H, quintet, *J* 7.3, H-6), 1.86 (1H, septet, *J* 6.9, H-12), 2.87 (2H, t, *J* 7.3, H-5), 3.10 (2H, d, *J* 6.9, H-11), 3.66 (2H, s, H-3) and 6.75 (1H, s, H-4); C (125MHz; CDCl3) *E* isomer: 13.95 (C-10), 20.25 (C-13), 22.46 (C-8 or 9), 27.79 (C-12), 28.10 (C-7), 30.20 (C-6), 31.26 (C-8 or 9), 33.71 (C-5), 48.55 (C-3), 49.76 (C-11), 123.64 (C-2), 133.10 (C-4) and 162.91 (C-1); *Z* isomer: 14.00 (C-10), 20.30 (C-13), 22.50 (C-8 or 9), 27.78 (C-12), 28.15 (C-7), 30.05 (C-6), 31.35 (C-8 or 9), 34.82 (C-5), 48.76 (C-3), 49.78 (C-11), 124.78 (C-2), 133.22 (C-4) and 163.00 (C-1); *m/z* (EI), *E* isomer: 255 (M+, 15%), 212 (100), 128 (18); *Z* isomer: 255 (M+, 9%), 222 (16), 212 (100), 128 (35) (*E* isomer: Found: M+, 255.1657. C14H25NOS requires *M*, 255.1657; *Z* isomer: Found: M+,255.1663. C14H25NOS requires *M*, 255.1657).

**3-Hexylsulfanylmethylene-1-isobutyl-pyrrolidin-2-one 3d**

Isolated as colourless oil, max(neat)/cm-1 1624 (C=O); H (500 MHz; CDCl3).86-0.90 (9H, m, H-11, 14), 1.25-1.41 (6H, m, H-8, 9, 10), 1.67 (2H, quintet, *J* 7.6, H-7), 1.93 (1H, septet, *J* 6.9, H-13), 2.59 (2H, dt, *J* 6.9 and 2.6, H-3), 2.80 (2H, t, *J* 7.6, H-6), 3.15 (2H, d, *J* 7.8, H-12), 3.40 (2H, t, *J* 6.9, H-4) and 7.08 (1H, t, *J* 2.6, H-5); C (125MHz; CDCl3) 13.98 (C-11), 20.06 (C-14), 22.49 (C-9 or 10), 23.15 (C-3), 26.69 (C-13), 28.15 (C-8), 30.57 (C-7), 31.29 (C-9 or 10), 34.29 (C-6), 44.77 (C-4) 50.66 (C-12), 127.30 (C-2), 130.67 (C-5) and 167.20 (C-1); *m/z* (EI), 269 (M+, 22%), 226 (100), 213 (20), 184 (14), 141 (30), 110 (21), 80 (22), 67 (8), 55 (34) (Found: M+, 269.1812. C15H27NOS requires *M*, 269.1813).

**3-Hexylsulfanylmethylene-1-isobutyl-1-azacycloheptan-2-one 3f**

Isolated as colorless oil (*E/Z* = 85/15), max(neat)/cm-1 *E* isomer: 1632 (C=O); *Z* isomer: 1636 (C=O); H (500 MHz; CDCl3) *E* isomer: 0.86-0.93 (9H, m, H-13, 16), 1.01-1.47 (6H, m, H-10, 11, 12), 1.63-1.77 (6H, m, H-4, 5, 9), 1.93 (1H, septet, *J* = 2.7 Hz, H-15), 2.20-2.61 (2H, m, H-3), 2.76 (2H, t, *J* 7.4, H-8), 3.20 (2H, d, *J* 7.3, H-14), 3.26-3.33 (2H, m, H-6) and 6.84 (1H, d, *J* = 1.7 Hz, H-7); *Z* isomer: 0.87 (3H, t, *J* 6.9, H-13), 0.92 (6H, d, *J* 6.9, H-16), 1.23-1.40 (6H, m, H-10, 11, 12), 1.58-1.72 (6H, m, H-4, 5, 9), 1.92 (1H, septet, *J* 6.9, H-15), 2.29-2.34 (2H, m, H-3), 2.64 (2H, t, *J* 7.3, H-8), 3.24 (2H, d, *J* 6.0, H-14), 3.24-3.28 (2H, m, H-6) and 6.15 (1H, s, H-7); C (125MHz; CDCl3) *E* isomer: 14.04 (C-13), 20.30 (C-16), 22.53 (C-12), 22.85 (C-4), 26.48 (C-3), 27.55 (C-5 or 15), 27.60 (C-5 or 15), 28.26 (C-10), 30.51 (C-9), 31.34 (C-11), 34.15 (C-8), 47.28 (C-6), 55.20 (C-14), 133.23 (C-2), 134.12 (C-7) and 170.40 (C-1); *Z* isomer: 14.01 (C-13), 20.20 (C-16), 22.54 (C-12), 27.32 (C-5 or 15), 27.53 (C-5 or 15), 28.25 (C-3, 4 or 10), 29.41 (C-3, 4 or 10), 30.21 (C-3, 4 or 10), 31.38 (C-11), 32.88 (C-9), 34.61 (C-8), 49.23 (C-6), 54.94 (C-14), 129.84 (C-2), 134.55 (C-7) and 171.33 (C-1); *m/z* (EI), *E* isomer: 297 (M+, 21%), 264 (44), 254 (86), 254 (86), 212 (100), 169 (32), 156 (42), 140 (22), 113 (28), 96 (21), 79 (59), 67 (32), 55 (78); *Z* isomer: 297 (M+, 10%), 264 (66), 254 (71), 212 (100), 169 (36), 156 (34), 140 (22), 125 (18), 97 (20), 79 (55), 67 (32), 55 (92) (*E* isomer: Found: M+, 297.2126. C17H31NOS requires *M*, 297.2127. *Z* isomer: Found: M+, 297.2129. C17H31NOS requires *M*, 297.2127).

**3-Hexylsulfanylmethylene-1-isobutyl-1-azacyclooctan-2-one 3g**

#

Isolated as colourless oil (*E/Z* = 31/69), max(neat)/cm-1 *E* isomer: 1638 (C=O); *Z* isomer: 1638 (C=O); H (500 MHz; CDCl3) *E* isomer: 0.87 (3H, t, *J* 7.3, H-14), 0.97 (6H, d, *J* 6.9, H-17), 1.25-1.38 (6H, m, H-11, 12, 13), 1.48-1.64 (8H, m, H-4, 5, 6, 9), 2.06 (1H, septet, *J* 6.9, H-16), 2.39 (2H, t, *J* 5.8, H-3), 2.65 (2H, t, *J* 7.3, H-9), 3.15 (2H, d, *J* 7.3, H-15), 3.40 (2H, t, *J* 5.8, H-7) and 5.86 (1H, s, H-8); *Z* isomer: 0.87 (3H, t, *J* 7.1, H-14), 0.91 (6H, d, *J* 6.4, H-17), 1.24-1.40 (6H, m, H-11, 12, 13), 1.48-1.64 (8H, m, H-4, 5, 6, 9), 2.00 (1H, septet, *J* 6.4, H-16), 2.46 (2H, t, *J* 5.8, H-3), 2.67 (2H, t, *J* 7.3, H-9), 3.14 (2H, d, *J* 7.8, H-15), 3.44 (2H, t, *J* 5.8, H-7) and 5.93 (1H, s, H-8); C (125MHz; CDCl3) *E* isomer: 14.01 (C-14), 20.37 (C-17), 22.55 (C-13), 24.55 (C-3, 4, or 5), 27.01 (C-6 or 16), 27.52 (C-6 or 16), 28.28 (C-11), 28.84 (C-3, 4, or 5), 30.38 (C-10), 31.36 (C-12), 34.02 (C-9), 38.26 (C-3, 4 or 5), 46.61 (C-7), 50.95 (C-15), 121.98 (C-2), 137.82 (C-8) and 171.62 (C-1); *Z* isomer: 13.99 (C-14), 20.19 (C-17), 22.52 (C-13), 25.07 (C-3, 4, or 5), 25.45 (C-6 or 16), 26.94 (C-6 or 16), 28.23 (C-11), 30.33 (C-3, 4, or 5), 31.33 (C-12), 33.68 (C9 or 10), 33.97 (C-9 or 10), 47.03 (C-7), 51.23 (C-15), 124.25 (C-2), 137.00 (C-8) and 172.90 (C-1); *m/z* (EI), *E* isomer: 311 (M+, 37%), 278 (35), 268 (100), 226 (89), 170 (61), 139 (50); *Z* isomer: 311 (M+, 29%), 278 (59), 268 (83), 226 (100), 170 (54), 139 (45), 57 (55) (*E* isomer: Found: M+, 311.2284. C18H33NOS requires *M*, 311.2282. *Z* isomer: Found: M+, 311.2281. C18H33NOS requires *M*, 311.2282). NOE between H3 and H8: 4.7% (E), 2.0% (Z).

**5E (G = Si)**

**RHF/DZP**

1\1\ MARCCENTRE-GETAFIX\FOpt\RHF\Gen\C5H9N1O1Si1\HIROSHI\06-May-2003\1\\#HF/GEN PSEUDO=READ SCF=DIRECT OPT=(Z-MATRIX,CALCFC,MAXCYCLE=100) NOSYMM\\formation of E-si\\0,1\C\C,1,r1\N,2,r2,1,a1\C,3,r3,2,a2,1,d1,0\C,4,r4,3,a3,2,d2,0\C,1,r5,2,a4,3,d3,0\O,2,r6,3,a5,4,d4,0\H,3,r7,2,a6,1,d5,0\H,4,r8,3,a7,2,d6,0\H,4,r9,3,a8,2,d7,0\H,5,r10,4,a9,3,d8,0\H,5,r11,4,a10,3,d9,0\Si,6,r12,1,a11,2,d10,0\H,6,r13,1,a12,2,d11,0\H,13,r14,6,a13,1,d12,0\H,13,r15,6,a14,1,d13,0\H,13,r16,6,a15,1,d14,0\\r1=1.50739551\r2=1.35843458\r3=1.45172196\r4=1.54073266\r5=1.32678173\r6=1.19943176\r7=0.9953746\r8=1.08295954\r9=1.08713185\r10=1.08148869\r11=1.08551683\r12=1.87358653\r13=1.08030381\r14=1.46924463\r15=1.46809342\r16=1.46949076\a1=106.51856259\a2=114.26763244\a3=103.10696742\a4=121.44265387\a5=126.26837283\a6=119.10689612\a7=110.98459623\a8=111.21853595\a9=112.05591561\a10=109.8829855\a11=127.58737778\a12=114.66339136\a13=109.54347326\a14=110.92020407\a15=109.69567528\d1=11.1397798\d2=-21.77506498\d3=185.22845185\d4=-169.02067974\d5=-190.65950729\d6=-142.13517258\d7=97.31805582\d8=145.14075646\d9=-94.79233831\d10=179.47710084\d11=-1.04948414\d12=119.78447929\d13=-0.65969563\d14=238.69733759\\Version=DEC-AXP-OSF/1-G98RevA.7\HF=-327.7356896\RMSD=3.378e-09\RMSF=1.057e-05\Dipole=1.5011154,0.1941765,-0.7635946\PG=C01 [X(C5H9N1O1Si1)]\\@

# B3LYP/DZP

1\1\ MARCCENTRE-GETAFIX\FOpt\RB3LYP\Gen\C5H9N1O1Si1\HIROSHI\07-May-2003\1\\#B3LYP/GEN PSEUDO=READ SCF=DIRECT GEOM=CHECK GUESS=READ OPT=(Z-MATRIX,READFC,MAXCYCLE=100) NOSYMM\\formation of E-si\\0,1\C\C,1,r1\N,2,r2,1,a1\C,3,r3,2,a2,1,d1,0\C,4,r4,3,a3,2,d2,0\C,1,r5,2,a4,3,d3,0\O,2,r6,3,a5,4,d4,0\H,3,r7,2,a6,1,d5,0\H,4,r8,3,a7,2,d6,0\H,4,r9,3,a8,2,d7,0\H,5,r10,4,a9,3,d8,0\H,5,r11,4,a10,3,d9,0\Si,6,r12,1,a11,2,d10,0\H,6,r13,1,a12,2,d11,0\H,13,r14,6,a13,1,d12,0\H,13,r15,6,a14,1,d13,0\H,13,r16,6,a15,1,d14,0\\r1=1.51265163\r2=1.37637578\r3=1.45994054\r4=1.55232525\r5=1.34612844\r6=1.22556036\r7=1.01216334\r8=1.09558583\r9=1.09947092\r10=1.09314815\r11=1.09714578\r12=1.86804461\r13=1.09312772\r14=1.47835931\r15=1.47695522\r16=1.47803633\a1=106.19187957\a2=114.61376531\a3=103.10856921\a4=121.27652582\a5=126.25868556\a6=119.60290337\a7=111.24150328\a8=111.22054734\a9=112.12716262\a10=109.75152738\a11=127.49223204\a12=114.13252766\a13=110.19112929\a14=110.99690694\a15=110.08769631\d1=9.58460005\d2=-19.30127446\d3=185.14338022\d4=-170.5280701\d5=-189.15709513\d6=-139.66926436\d7=99.70518529\d8=143.33696849\d9=-97.07954642\d10=179.22430398\d11=-1.12884214\d12=115.90959942\d13=-4.51800086\d14=234.78457745\\Version=DEC-AXP-OSF/1-G98RevA.7\HF=-329.8753226\RMSD=3.035e-09\RMSF=3.115e-05\Dipole=1.5251797,0.1384227,-0.5800885\PG=C01 [X(C5H9N1O1Si1)]\\@

**5Z (G = Si)**

**RHF/DZP**

1\1\ MARCCENTRE-GETAFIX\FOpt\RHF\Gen\C5H9N1O1Si1\HIROSHI\06-May-2003\1\\#HF/GEN PSEUDO=READ SCF=DIRECT OPT=(Z-MATRIX,CALCFC,MAXCYCLE=100) NOSYMM\\formation of Z-si\\0,1\C\C,1,r1\N,2,r2,1,a1\C,3,r3,2,a2,1,d1,0\C,4,r4,3,a3,2,d2,0\C,1,r5,2,a4,3,d3,0\O,2,r6,3,a5,4,d4,0\H,3,r7,2,a6,1,d5,0\H,4,r8,3,a7,2,d6,0\H,4,r9,3,a8,2,d7,0\H,5,r10,4,a9,3,d8,0\H,5,r11,4,a10,3,d9,0\Si,6,r12,1,a11,2,d10,0\H,6,r13,1,a12,2,d11,0\H,13,r14,6,a13,1,d12,0\H,13,r15,6,a14,1,d13,0\H,13,r16,6,a15,1,d14,0\\r1=1.49929456\r2=1.35577845\r3=1.45376426\r4=1.54128214\r5=1.32660547\r6=1.20243365\r7=0.9953668\r8=1.0829094\r9=1.08684486\r10=1.0824109\r11=1.08536871\r12=1.89225992\r13=1.08098774\r14=1.46380606\r15=1.46363488\r16=1.47491017\a1=106.85905365\a2=114.16273555\a3=103.01898286\a4=123.09764184\a5=126.57014103\a6=119.36835655\a7=110.9021067\a8=111.08834184\a9=112.33172102\a10=109.95486513\a11=126.43940439\a12=116.76548601\a13=112.11769011\a14=112.13967037\a15=104.97914369\d1=10.63241982\d2=-21.17029848\d3=185.72984198\d4=-169.3552149\d5=-190.33887845\d6=-141.59128487\d7=97.94595018\d8=144.33094413\d9=-95.20943141\d10=-1.64726121\d11=178.60914734\d12=61.66914208\d13=-64.53636151\d14=178.56580906\\Version=DEC-AXP-OSF/1-G98RevA.7\HF=-327.7360841\RMSD=6.552e-09\RMSF=1.667e-05\Dipole=1.7285034,0.1611372,-0.751483\PG=C01 [X(C5H9N1O1Si1)]\\@

# B3LYP/DZP

1\1\ MARCCENTRE-GETAFIX\FOpt\RB3LYP\Gen\C5H9N1O1Si1\HIROSHI\07-May-2003\1\\#B3LYP/GEN PSEUDO=READ SCF=DIRECT GEOM=CHECK GUESS=READ OPT=(Z-MATRIX,READFC,MAXCYCLE=100) NOSYMM\\formation of Z-si\\0,1\C\C,1,r1\N,2,r2,1,a1\C,3,r3,2,a2,1,d1,0\C,4,r4,3,a3,2,d2,0\C,1,r5,2,a4,3,d3,0\O,2,r6,3,a5,4,d4,0\H,3,r7,2,a6,1,d5,0\H,4,r8,3,a7,2,d6,0\H,4,r9,3,a8,2,d7,0\H,5,r10,4,a9,3,d8,0\H,5,r11,4,a10,3,d9,0\Si,6,r12,1,a11,2,d10,0\H,6,r13,1,a12,2,d11,0\H,13,r14,6,a13,1,d12,0\H,13,r15,6,a14,1,d13,0\H,13,r16,6,a15,1,d14,0\\r1=1.50156144\r2=1.3738867\r3=1.46184691\r4=1.55361857\r5=1.34599155\r6=1.22934708\r7=1.01205344\r8=1.09559007\r9=1.0991584\r10=1.09383272\r11=1.09688382\r12=1.8886724\r13=1.09204647\r14=1.47307248\r15=1.47292224\r16=1.4833231\a1=106.71511719\a2=114.43849446\a3=103.19284248\a4=122.3447846\a5=126.56418771\a6=119.99273009\a7=111.14043029\a8=111.08496965\a9=112.10909854\a10=109.97260119\a11=125.39378513\a12=117.13889383\a13=112.52522456\a14=112.61866578\a15=105.16078142\d1=9.06176043\d2=-18.02723704\d3=184.64757822\d4=-170.92611715\d5=-188.64204218\d6=-138.43097776\d7=101.09083274\d8=141.35916592\d9=-98.74159557\d10=-1.25192946\d11=178.88134029\d12=61.82004125\d13=-64.55123728\d14=178.62475239\\Version=DEC-AXP-OSF/1-G98RevA.7\HF=-329.8754668\RMSD=3.442e-09\RMSF=3.307e-05\Dipole=1.8220608,0.1086514,-0.6243423\PG=C01[X(C5H9N1O1Si1)]\\@

# 5E (G = Sn)

**RHF/DZP**

1\1\ MARCCENTRE-GETAFIX\FOpt\RHF\Gen\C5H9N1O1Sn1\HIROSHI\07-May-2003\1\\#HF/GEN PSEUDO=READ SCF=DIRECT GEOM=MODIFY GUESS=READ OPT=(Z-MATRIX,CALCFC,MAXCYCLE=100) NOSYMM\\formation of E-Sn\\0,1\C\C,1,r1\N,2,r2,1,a1\C,3,r3,2,a2,1,d1,0\C,4,r4,3,a3,2,d2,0\C,1,r5,2,a4,3,d3,0\O,2,r6,3,a5,4,d4,0\H,3,r7,2,a6,1,d5,0\H,4,r8,3,a7,2,d6,0\H,4,r9,3,a8,2,d7,0\H,5,r10,4,a9,3,d8,0\H,5,r11,4,a10,3,d9,0\Sn,6,r12,1,a11,2,d10,0\H,6,r13,1,a12,2,d11,0\H,13,r14,6,a13,1,d12,0\H,13,r15,6,a14,1,d13,0\H,13,r16,6,a15,1,d14,0\\r1=1.50837013\r2=1.35917412\r3=1.45186545\r4=1.54005933\r5=1.32630032\r6=1.19939178\r7=0.9954138\r8=1.08298233\r9=1.08722547\r10=1.08202288\r11=1.08586305\r12=2.13162822\r13=1.08013326\r14=1.70341072\r15=1.70390123\r16=1.70255453\a1=106.52304089\a2=114.18768816\a3=102.98126773\a4=121.65308318\a5=126.20184997\a6=119.03704751\a7=110.99396114\a8=111.25812215\a9=112.17044598\a10=109.75031536\a11=127.63607726\a12=114.49269939\a13=109.87331016\a14=110.15675082\a15=108.71831323\d1=11.23154311\d2=-22.33444397\d3=185.68600951\d4=-168.85996597\d5=-191.11688549\d6=-142.69731347\d7=96.70885245\d8=145.99351411\d9=-93.86867264\d10=179.00852688\d11=-1.2713655\d12=101.99945866\d13=-18.29391294\d14=221.40508307\\Version=DEC-AXP-OSF/1-G98RevA.7\HF=-327.1801093\RMSD=8.030e-09\RMSF=9.848e-07\Dipole=1.4514504,0.2008615,-0.8206929\PG=C01[X(C5H9N1O1Sn1)]\\@

# B3LYP/DZP

1\1\ MARCCENTRE-GETAFIX\FOpt\RB3LYP\Gen\C5H9N1O1Sn1\HIROSHI\07-May-2003\1\\#B3LYP/GEN PSEUDO=READ SCF=DIRECT GEOM=CHECK GUESS=READ OPT=(Z-MATRIX,READFC,MAXCYCLE=100) NOSYMM\\formation of E-Sn\\0,1\C\C,1,r1\N,2,r2,1,a1\C,3,r3,2,a2,1,d1,0\C,4,r4,3,a3,2,d2,0\C,1,r5,2,a4,3,d3,0\O,2,r6,3,a5,4,d4,0\H,3,r7,2,a6,1,d5,0\H,4,r8,3,a7,2,d6,0\H,4,r9,3,a8,2,d7,0\H,5,r10,4,a9,3,d8,0\H,5,r11,4,a10,3,d9,0\Sn,6,r12,1,a11,2,d10,0\H,6,r13,1,a12,2,d11,0\H,13,r14,6,a13,1,d12,0\H,13,r15,6,a14,1,d13,0\H,13,r16,6,a15,1,d14,0\\r1=1.51378178\r2=1.3771985\r3=1.46019417\r4=1.55183665\r5=1.34456227\r6=1.22541684\r7=1.01221939\r8=1.09558271\r9=1.09950086\r10=1.09422685\r11=1.09748431\r12=2.12938122\r13=1.09228593\r14=1.71174691\r15=1.71245689\r16=1.70888959\a1=106.17029393\a2=114.56753034\a3=103.01352598\a4=121.59547378\a5=126.20778462\a6=119.52280408\a7=111.24683243\a8=111.25552014\a9=112.17692103\a10=109.67181043\a11=126.66998051\a12=114.46291112\a13=110.55858737\a14=109.84688187\a15=109.0956069\d1=9.79241991\d2=-19.81418053\d3=185.37239884\d4=-170.29752097\d5=-189.62566426\d6=-140.18338378\d7=99.14886965\d8=143.85066851\d9=-96.439455\d10=178.5783492\d11=-1.25204419\d12=88.48610175\d13=-31.16678921\d14=208.41695242\\Version=DEC-AXP-OSF/1-G98RevA.7\HF=-329.3266688\RMSD=9.306e-09\RMSF=1.097e-05\Dipole=1.4786473,0.1456988,-0.6184511\PG=C01[X(C5H9N1O1Sn1)]\\@

**5Z (G = Sn)**

**RHF/DZP**

1\1\ MARCCENTRE-GETAFIX\FOpt\RHF\Gen\C5H9N1O1Sn1\HIROSHI\06-May-2003\1\\#HF/GEN PSEUDO=READ SCF=DIRECT GEOM=CHECK GUESS=READ OPT=(Z-MATRIX,CALCFC,MAXCYCLE=100) NOSYMM\\formation of Z-Sn\\0,1\C\C,1,r1\N,2,r2,1,a1\C,3,r3,2,a2,1,d1,0\C,4,r4,3,a3,2,d2,0\C,1,r5,2,a4,3,d3,0\O,2,r6,3,a5,4,d4,0\H,3,r7,2,a6,1,d5,0\H,4,r8,3,a7,2,d6,0\H,4,r9,3,a8,2,d7,0\H,5,r10,4,a9,3,d8,0\H,5,r11,4,a10,3,d9,0\Sn,6,r12,1,a11,2,d10,0\H,6,r13,1,a12,2,d11,0\H,13,r14,6,a13,1,d12,0\H,13,r15,6,a14,1,d13,0\H,13,r16,6,a15,1,d14,0\\r1=1.4946625\r2=1.34929736\r3=1.45588486\r4=1.54346995\r5=1.32526886\r6=1.20747975\r7=0.99534018\r8=1.08283086\r9=1.08633928\r10=1.08236891\r11=1.08505208\r12=2.15377423\r13=1.08061634\r14=1.69656552\r15=1.69608551\r16=1.72106017\a1=107.46382903\a2=114.04310555\a3=103.36121029\a4=121.01757156\a5=126.93687188\a6=119.92600641\a7=110.7689314\a8=110.81228355\a9=112.10295981\a10=110.09693823\a11=122.99295209\a12=117.8799399\a13=112.945535\a14=113.03115563\a15=102.55663729\d1=9.89591797\d2=-19.33178791\d3=184.51631973\d4=-169.94224263\d5=-189.22114285\d6=-139.88077534\d7=99.91963562\d8=142.09883274\d9=-97.57277009\d10=-1.64110919\d11=178.89152804\d12=64.94778241\d13=-65.98416808\d14=179.46186376\\Version=DEC-AXP-OSF/1-G98RevA.7\HF=-327.1863667\RMSD=5.499e-09\RMSF=1.664e-05\Dipole=1.8970068,0.1324609,-0.5691788\PG=C01 [X(C5H9N1O1Sn1)]\\@

# B3LYP/DZP

1\1\ MARCCENTRE-GETAFIX\FOpt\RB3LYP\Gen\C5H9N1O1Sn1\HIROSHI\07-May-2003\1\\#B3LYP/GEN PSEUDO=READ SCF=DIRECT GEOM=CHECK GUESS=READ OPT=(Z-MATRIX,READFC,MAXCYCLE=100) NOSYMM\\formation of Z-Sn\\0,1\C\C,1,r1\N,2,r2,1,a1\C,3,r3,2,a2,1,d1,0\C,4,r4,3,a3,2,d2,0\C,1,r5,2,a4,3,d3,0\O,2,r6,3,a5,4,d4,0\H,3,r7,2,a6,1,d5,0\H,4,r8,3,a7,2,d6,0\H,4,r9,3,a8,2,d7,0\H,5,r10,4,a9,3,d8,0\H,5,r11,4,a10,3,d9,0\Sn,6,r12,1,a11,2,d10,0\H,6,r13,1,a12,2,d11,0\H,13,r14,6,a13,1,d12,0\H,13,r15,6,a14,1,d13,0\H,13,r16,6,a15,1,d14,0\\r1=1.49752257\r2=1.36656801\r3=1.46409206\r4=1.55559187\r5=1.34339814\r6=1.23461581\r7=1.0120096\r8=1.09548744\r9=1.09854891\r10=1.09375437\r11=1.09636751\r12=2.15629001\r13=1.09125367\r14=1.70574131\r15=1.70524103\r16=1.73034276\a1=107.40613652\a2=114.29229659\a3=103.55119055\a4=120.3438566\a5=126.84765619\a6=120.58900444\a7=110.94731969\a8=110.79731973\a9=111.87669359\a10=110.15517901\a11=121.61897605\a12=118.53527765\a13=113.59235351\a14=113.61132703\a15=102.36149404\d1=8.10620147\d2=-15.82647192\d3=183.48749883\d4=-171.80753631\d5=-187.43265928\d6=-136.3492016\d7=103.48151828\d8=138.66352713\d9=-101.51387675\d10=-1.36375231\d11=179.12527554\d12=65.51119554\d13=-66.29208446\d14=179.5932498\\Version=DEC-AXP-OSF/1-G98RevA.7\HF=-329.3324526\RMSD=7.905e-09\RMSF=2.900e-05\Dipole=2.0465407,0.0858404,-0.4426618\PG=C01 [X(C5H9N1O1Sn1)]\\@

**5E (G = SMe)**

**RHF/DZP**

1\1\ MARCCENTRE-GETAFIX\FOpt\RHF\Gen\C6H9N1O1S1\HIROSHI\08-May-2003\1\\#HF/GEN PSEUDO=READ SCF=DIRECT GEOM=CHECK GUESS=READ OPT=(Z-MATRIX,CALCFC,MAXCYCLE=100) NOSYMM\\formation of E-SMe\\0,1\C\C,1,r1\N,2,r2,1,a1\C,3,r3,2,a2,1,d1,0\C,4,r4,3,a3,2,d2,0\C,1,r5,2,a4,3,d3,0\O,2,r6,3,a5,4,d4,0\H,3,r7,2,a6,1,d5,0\H,4,r8,3,a7,2,d6,0\H,4,r9,3,a8,2,d7,0\H,5,r10,4,a9,3,d8,0\H,5,r11,4,a10,3,d9,0\S,6,r12,1,a11,2,d10,0\H,6,r13,1,a12,2,d11,0\C,13,r14,6,a13,1,d12,0\H,15,r15,13,a14,6,d13,0\H,15,r16,13,a15,6,d14,0\H,15,r17,13,a16,6,d15,0\\r1=1.49358274\r2=1.36026028\r3=1.45283687\r4=1.54291191\r5=1.32391499\r6=1.201821\r7=0.99526017\r8=1.08310344\r9=1.08696004\r10=1.08355152\r11=1.08571772\r12=1.75959194\r13=1.07639776\r14=1.81677795\r15=1.08165917\r16=1.08184318\r17=1.08209832\a1=106.20737439\a2=114.28446974\a3=103.40209725\a4=121.21849916\a5=126.12334493\a6=118.91795229\a7=110.91863362\a8=111.11654916\a9=112.04513593\a10=110.45916431\a11=124.3808916\a12=118.30217612\a13=100.68753117\a14=110.93852847\a15=110.81992362\a16=106.61104737\d1=11.47558389\d2=-20.56960379\d3=183.24784398\d4=-168.74605195\d5=-191.14686184\d6=-141.03990929\d7=98.55044404\d8=141.89308378\d9=-97.88256975\d10=180.43258318\d11=-0.53725023\d12=186.97643658\d13=62.07122291\d14=-60.69482396\d15=180.7691406\\Version=DEC-AXP-OSF/1-G98RevA.7\HF=-371.7523376\RMSD=3.265e-09\RMSF=9.454e-06\Dipole=0.7099043,0.3425282,-0.8700142\PG=C01[X(C6H9N1O1S1)]\\@

# B3LYP/DZP

1\1\ MARCCENTRE-GETAFIX\FOpt\RB3LYP\Gen\C6H9N1O1S1\HIROSHI\08-May-2003\1\\#B3LYP/GEN PSEUDO=READ SCF=DIRECT GEOM=MODIFY GUESS=READ OPT=(Z-MATRIX,CALCFC,MAXCYCLE=100) NOSYMM\\formation of E-SMe\\0,1\C\C,1,r1\N,2,r2,1,a1\C,3,r3,2,a2,1,d1,0\C,4,r4,3,a3,2,d2,0\C,1,r5,2,a4,3,d3,0\O,2,r6,3,a5,4,d4,0\H,3,r7,2,a6,1,d5,0\H,4,r8,3,a7,2,d6,0\H,4,r9,3,a8,2,d7,0\H,5,r10,4,a9,3,d8,0\H,5,r11,4,a10,3,d9,0\S,6,r12,1,a11,2,d10,0\H,6,r13,1,a12,2,d11,0\C,13,r14,6,a13,1,d12,0\H,15,r15,13,a14,6,d13,0\H,15,r16,13,a15,6,d14,0\H,15,r17,13,a16,6,d15,0\\r1=1.49515379\r2=1.38155937\r3=1.4606665\r4=1.55483587\r5=1.34657613\r6=1.22832691\r7=1.01194683\r8=1.0958267\r9=1.09957633\r10=1.0957826\r11=1.09773668\r12=1.76183476\r13=1.08971166\r14=1.83521091\r15=1.09315547\r16=1.09334186\r17=1.09353706\a1=105.89259711\a2=114.3576232\a3=103.36167246\a4=121.12278334\a5=125.8722698\a6=119.09718836\a7=111.23794995\a8=111.25289576\a9=111.96294904\a10=110.39806124\a11=124.41966708\a12=118.10824533\a13=100.47485091\a14=110.86571942\a15=110.7271863\a16=106.56066221\d1=10.88085286\d2=-19.02325142\d3=182.76951074\d4=-169.46285056\d5=-190.99119091\d6=-139.42549356\d7=99.97374936\d8=140.43502971\d9=-99.90229048\d10=180.26915265\d11=-0.59398023\d12=185.42424801\d13=62.32050972\d14=-60.50880669\d15=180.99568484\\Version=DEC-AXP-OSF/1-G98RevA.7\HF=-374.218592\RMSD=5.208e-09\RMSF=1.228e-05\Dipole=0.6870939,0.2845288,-0.9093261\PG=C01 [X(C6H9N1O1S1)]\\@

**5Z (G = SMe)**

# RHF/DZP

1\1\ MARCCENTRE-GETAFIX\FOpt\RHF\Gen\C6H9N1O1S1\HIROSHI\07-May-2003\1\\#HF/GEN PSEUDO=READ SCF=DIRECT OPT=(Z-MATRIX,CALCFC,MAXCYCLE=100) NOSYMM\\formation of Z-SMe\\0,1\C\C,1,r1\N,2,r2,1,a1\C,3,r3,2,a2,1,d1,0\C,4,r4,3,a3,2,d2,0\C,1,r5,2,a4,3,d3,0\O,2,r6,3,a5,4,d4,0\H,3,r7,2,a6,1,d5,0\H,4,r8,3,a7,2,d6,0\H,4,r9,3,a8,2,d7,0\H,5,r10,4,a9,3,d8,0\H,5,r11,4,a10,3,d9,0\S,6,r12,1,a11,2,d10,0\H,6,r13,1,a12,2,d11,0\C,13,r14,6,a13,1,d12,0\H,15,r15,13,a14,6,d13,0\H,15,r16,13,a15,6,d14,0\H,15,r17,13,a16,6,d15,0\\r1=1.49219233\r2=1.36424995\r3=1.45246625\r4=1.53992293\r5=1.32710358\r6=1.20023393\r7=0.99546772\r8=1.08768904\r9=1.0830762\r10=1.08573551\r11=1.08300234\r12=1.76265911\r13=1.07803505\r14=1.8173877\r15=1.08272398\r16=1.08281224\r17=1.08260255\a1=106.41459614\a2=113.62596474\a3=102.75459121\a4=125.285542\a5=125.97321282\a6=118.39697052\a7=111.34838892\a8=111.03005117\a9=109.69840774\a10=112.19019678\a11=127.11091105\a12=118.3362683\a13=98.95398636\a14=111.47488655\a15=111.4410158\a16=106.40354723\d1=-12.6519762\d2=24.49839629\d3=173.82514919\d4=-192.52466215\d5=-166.77178362\d6=-94.40524353\d7=144.80693676\d8=92.28969366\d9=-147.41070824\d10=1.85587056\d11=181.67964595\d12=182.67360484\d13=61.99224231\d14=-61.37366162\d15=180.33436719\\Version=DEC-AXP-OSF/1-G98RevA.7\HF=-371.7453294\RMSD=8.353e-09\RMSF=1.845e-05\Dipole=1.2791669,-0.2997526,-1.5679122\PG=C01 [X(C6H9N1O1S1)]\\@

# B3LYP/DZP

1\1\ MARCCENTRE-GETAFIX\FOpt\RB3LYP\Gen\C6H9N1O1S1\HIROSHI\08-May-2003\1\\#B3LYP/GEN PSEUDO=READ SCF=DIRECT GEOM=CHECK GUESS=READ OPT=(Z-MATRIX,READFC,MAXCYCLE=100) NOSYMM\\formation of Z-SMe\\0,1\C\C,1,r1\N,2,r2,1,a1\C,3,r3,2,a2,1,d1,0\C,4,r4,3,a3,2,d2,0\C,1,r5,2,a4,3,d3,0\O,2,r6,3,a5,4,d4,0\H,3,r7,2,a6,1,d5,0\H,4,r8,3,a7,2,d6,0\H,4,r9,3,a8,2,d7,0\H,5,r10,4,a9,3,d8,0\H,5,r11,4,a10,3,d9,0\S,6,r12,1,a11,2,d10,0\H,6,r13,1,a12,2,d11,0\C,13,r14,6,a13,1,d12,0\H,15,r15,13,a14,6,d13,0\H,15,r16,13,a15,6,d14,0\H,15,r17,13,a16,6,d15,0\\r1=1.48772561\r2=1.38417531\r3=1.46171621\r4=1.55332033\r5=1.35064764\r6=1.22954592\r7=1.01221434\r8=1.10025266\r9=1.09567604\r10=1.09766315\r11=1.0945264\r12=1.7654551\r13=1.09015824\r14=1.83909177\r15=1.09405329\r16=1.09420803\r17=1.09400271\a1=106.45807591\a2=113.44545212\a3=102.94412062\a4=124.01271407\a5=125.96967876\a6=118.76802852\a7=111.36192951\a8=111.32670042\a9=109.65321858\a10=111.83088502\a11=125.82607261\a12=119.27016095\a13=98.63576885\a14=111.39734641\a15=111.41845909\a16=106.28584177\d1=-12.31821248\d2=22.67866271\d3=175.59657289\d4=-192.17955137\d5=-166.78792397\d6=-96.16125381\d7=142.93622667\d8=94.97252407\d9=-145.3570166\d10=1.66541523\d11=181.47776533\d12=182.26291815\d13=62.18036787\d14=-61.35351709\d15=180.42222958\\Version=DEC-AXP-OSF/1-G98RevA.7\HF=-374.2139405\RMSD=3.704e-09\RMSF=3.903e-05\Dipole=1.1185614,-0.2650264,-1.4059745\PG=C01 [X(C6H9N1O1S1)]\\@
